# Supplementary material for: Ultrasounds and a Postharvest Photoperiod to Enhance the Synthesis of Sulforaphane and Antioxidants in Rocket Sprouts
Source: MDPI journal article supplement (doi:10.3390/antiox11081490), 2022-07-29
Supplement: s1 [file s1]

## Supplementary Material

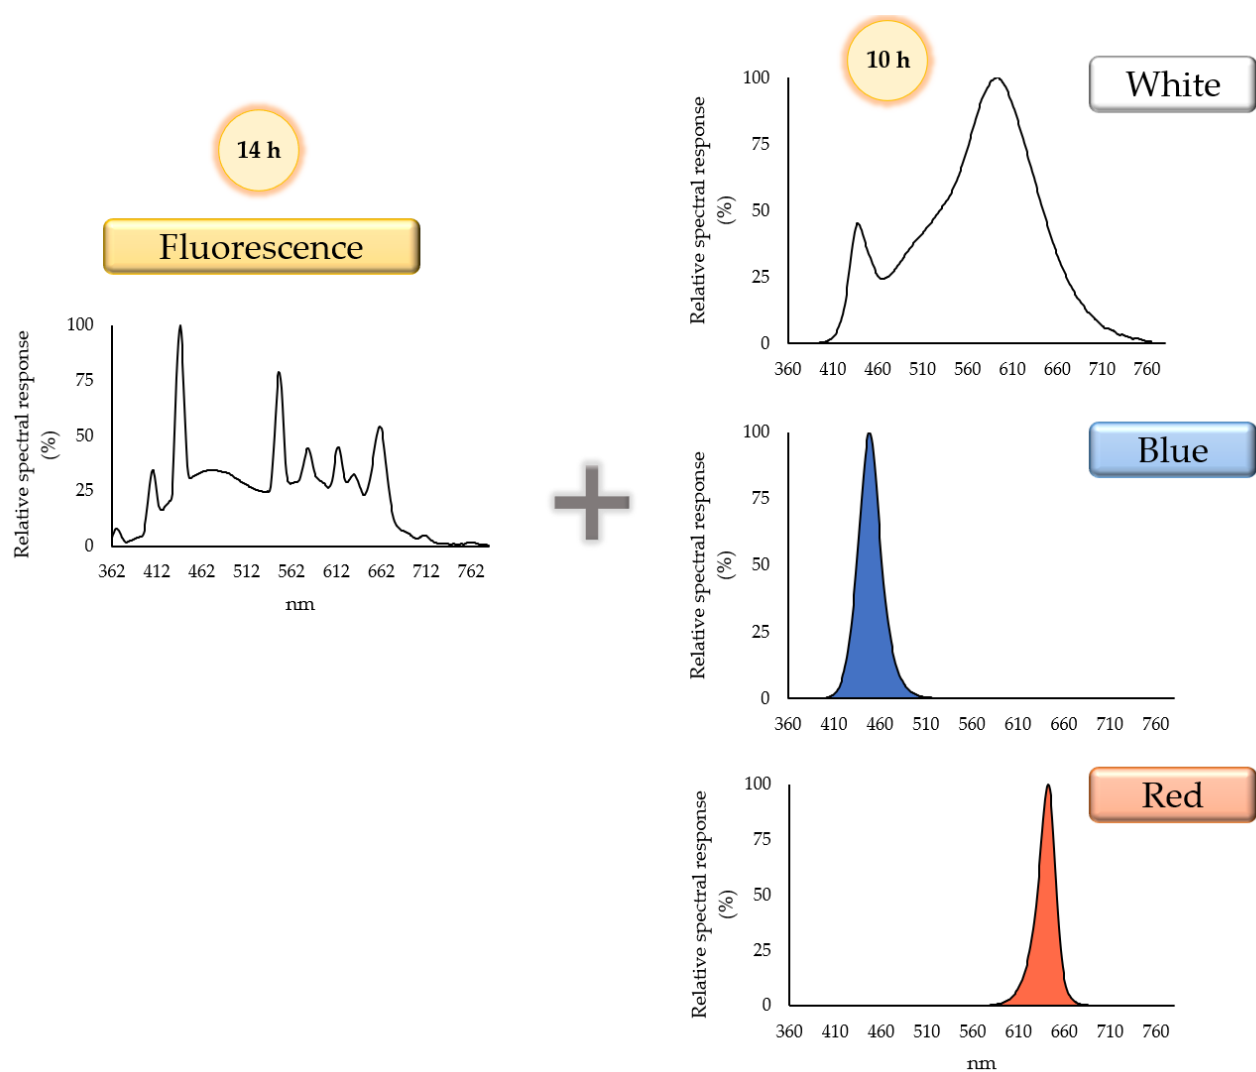

**Figure S1.** Light spectra used during postharvest storage. A photoperiod of 14 h Fluorescence light + 10 h Darkness was used as control.
